# Supplementary material for: The Parkinson's disease VPS35[D620N] mutation enhances LRRK2-mediated Rab protein phosphorylation in mouse and human
Source: Oxford University Press journal article supplement (doi:10.1042/bcj20180248), 2018-05-09
Supplement: bcj-2018-0248_supp.pdf [file bcj-2018-0248_supp.pdf]

**Supplementary Figure 1. Characterisation of the rabbit monoclonal Rab8A-total (MJF-22-74-3) antibody.** (A & B) Wild-type MEFs treated  $\pm$  100 nM MLI-2 inhibitor for 60 min prior to cell lysis. For immunoprecipitation analysis 100  $\mu$ g of whole cell extract was subjected to immunoprecipitation employing either the Rab8A-total (MJF-22-74-3) antibody or Pre-immune IgG (used as a control). The immunoprecipitates were subjected to Rab8A-total (10% of sample) and Rab8-pT72 immunoblot (90% of sample) (all at 1  $\mu$ g/ml primary antibody concentration). 10  $\mu$ g of whole cell extract or supernatants after immunoprecipitation were subjected to Rab8A-total immunoblot. (C) The indicated lysates of A549 wild-type and A549 Rab8A knock-out cells (10  $\mu$ g), HEK293 cells (10  $\mu$ g), human PBMCs (5  $\mu$ g), wild-type MEFs (10  $\mu$ g), as well as mouse lung, spleen, kidney and brain lysates (20  $\mu$ g) were subjected to Rab8A-total (MJF-22-74-3) immunoblot analysis.

**Supplementary Figure 2. Characterisation of the rabbit monoclonal Rab12-pS106 (MJF-25-9-1) antibody.** (A) HEK293 cells were co-transfected with plasmids encoding the LRRK2[Y1699C] pathogenic mutation and the indicated Rab protein that all possessed an N-terminal HA tag. 36 hours post transfection, cells were treated  $\pm$  150 nM MLI-2 inhibitor for 90 min prior to cell lysis. 0.5  $\mu$ g of whole cell extract was subjected to quantitative immunoblot analysis with the indicated antibodies (all at 1  $\mu$ g/ml primary antibody concentration), and the membranes developed using the Odyssey CLx scan Western Blot imaging system. (B) The indicated wild type and Rab12 knock-out A549 cells were treated  $\pm$  100 nM MLI-2 for 90 min prior to cell lysis. Generation of the Rab12 knock-out cells is described in the materials and methods. 30  $\mu$ g of whole cell extract was subjected to quantitative immunoblot analysis with the indicated antibodies (all at 1  $\mu$ g/ml primary antibody concentration). The membranes developed using the Odyssey CLx scan Western Blot imaging system. A duplicate Rab12-pS106 immunoblot analysis was developed using enhanced chemiluminescence (ECL) for comparison.

**Supplementary Figure 3: Three structurally unrelated LRRK2 inhibitors reduce elevated Rab10 phosphorylation in dose dependent manner in homozygous VPS35[D260N] knock-in cells.** Homozygous VPS35[D620N] knock-in and wild-type MEFs were treated with the indicated doses of MLI-2 [34, 35], GSK2578215A [36] and PF-06447475 [37] LRRK2 inhibitor for 60 min prior to cell lysis. 7.5  $\mu$ g of whole cell extracts were subjected to quantitative immunoblot analysis with the indicated antibodies (all at 1  $\mu$ g/ml primary antibody concentration), and the membranes developed using the Odyssey CLx scan Western Blot imaging system. Immunoblots were quantified by LiCor and presented as average  $\pm$  SEM $\pi$ . Each lane represents cell extract obtained from a different dish of cells.

**Supplementary Figure 4: Flow cytometry analysis to determine the purity and viability of isolated monocytes and neutrophils, and the composition of PBMC.**

Purified monocytes were stained with the monocyte specific marker CD14 employing anti-human CD14 V500 antibody while purified neutrophils were stained with the granulocyte specific marker CD66b using anti-human CD66b FITC antibody. Cells were also stained with the cell viability dye DAPI. Cells were analysed by flow cytometry revealing that isolated monocytes had a viability >99% and a purity 87-90%, while isolated neutrophils had a viability >99% and a purity 94-98%. PBMC were stained with the B cell marker CD19 APC, the T cell marker CD3 PE, the monocyte marker CD14 V500, the granulocyte marker CD66b FITC and

DAPI. \* corresponds to the monocyte and granulocyte parent gate. The proportion of each cell type within the isolated PBMC is provided. The data shown is for Donor A. A summary of the viability and purity data for all three donors is provided in Figure 6A.

**A**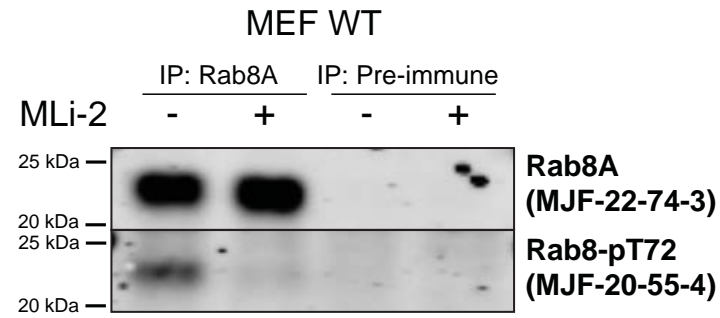**B**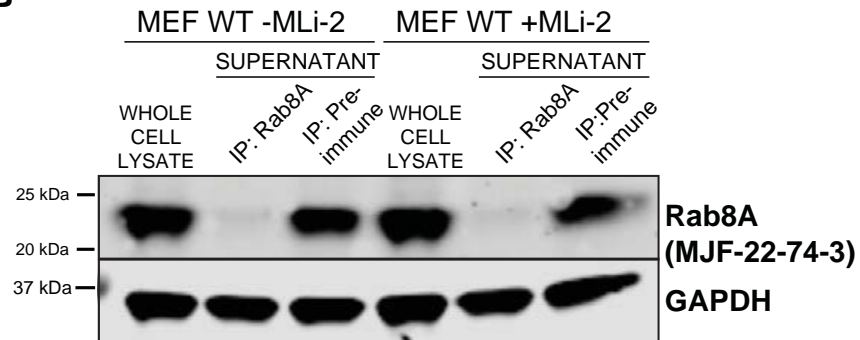**C**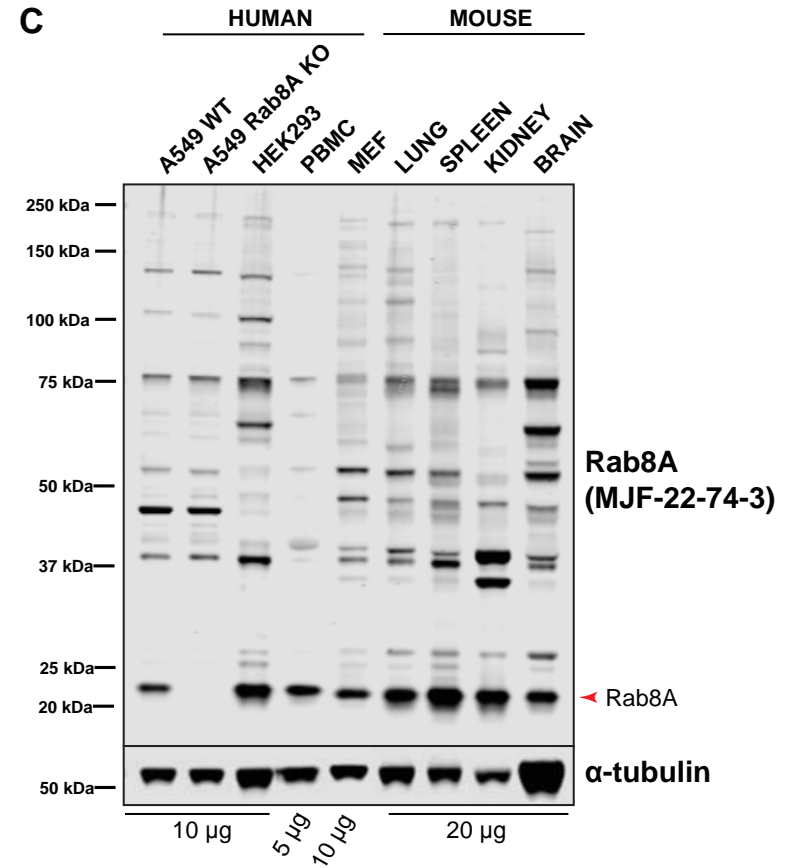

**Supplementary Figure 1**

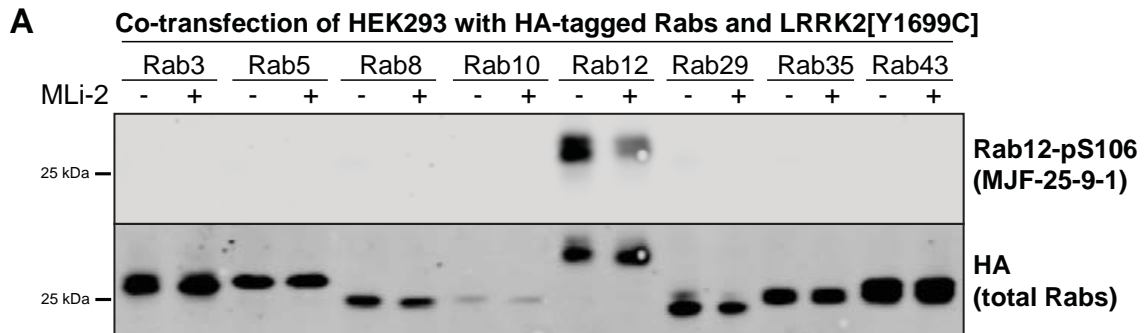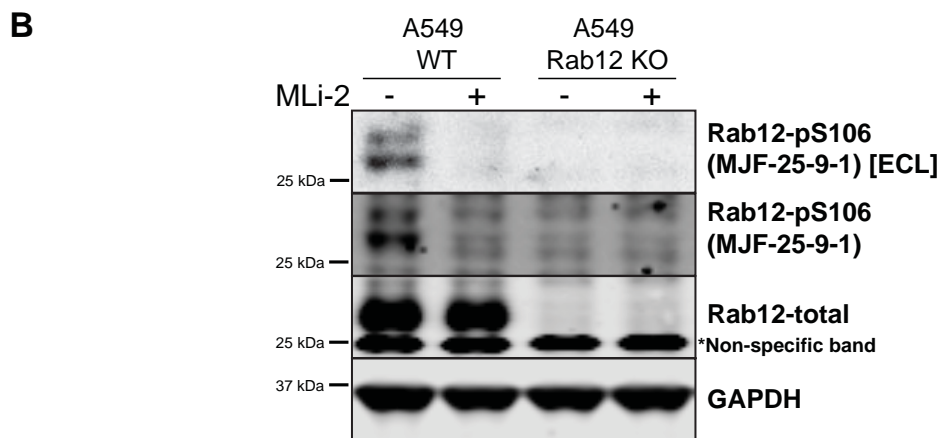

**Supplementary Figure 2**

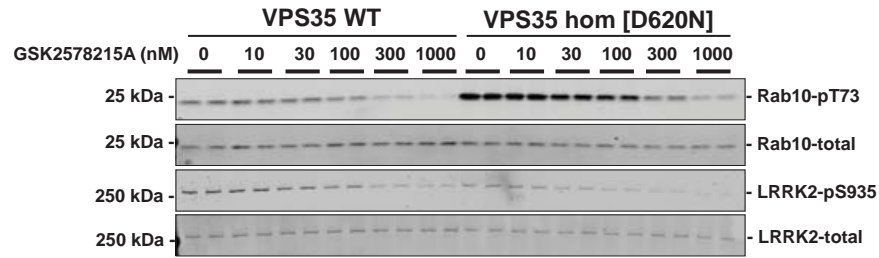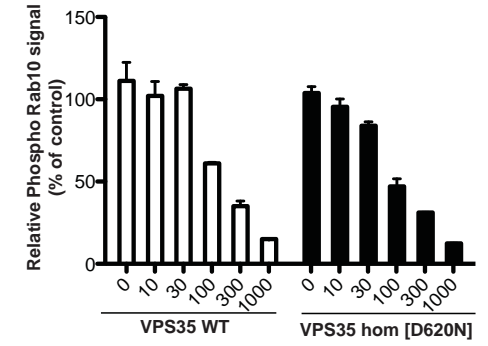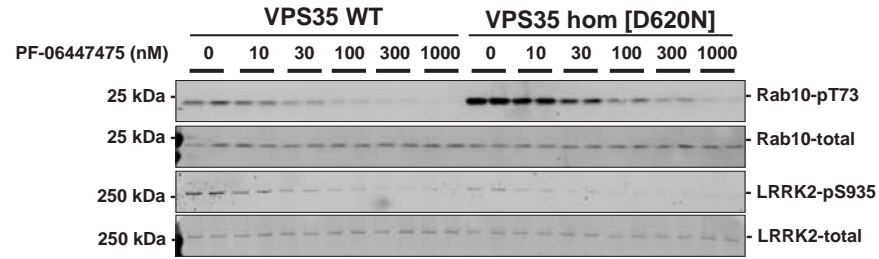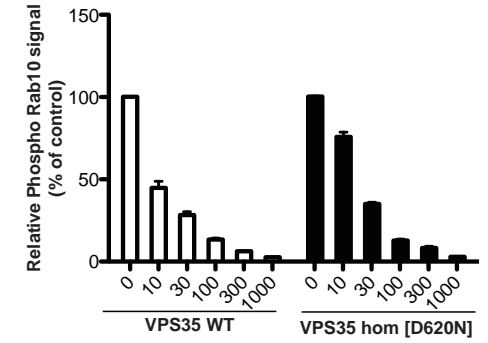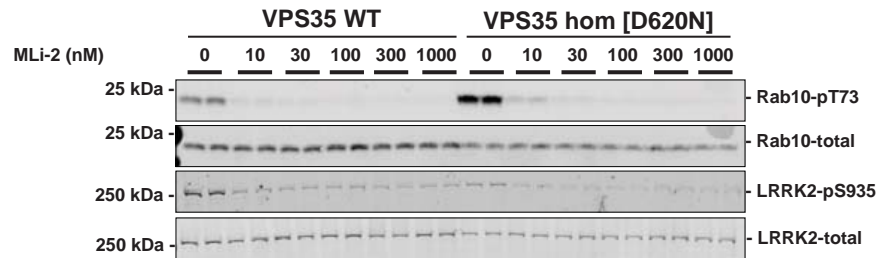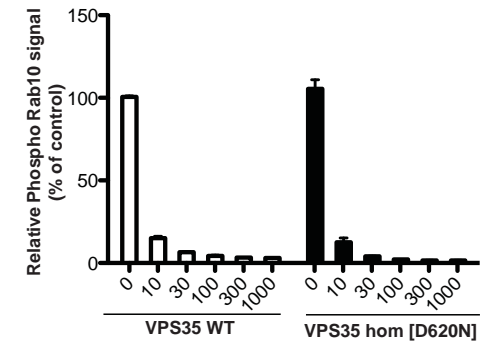

Supplementary Figure 3

**S Figure 4**

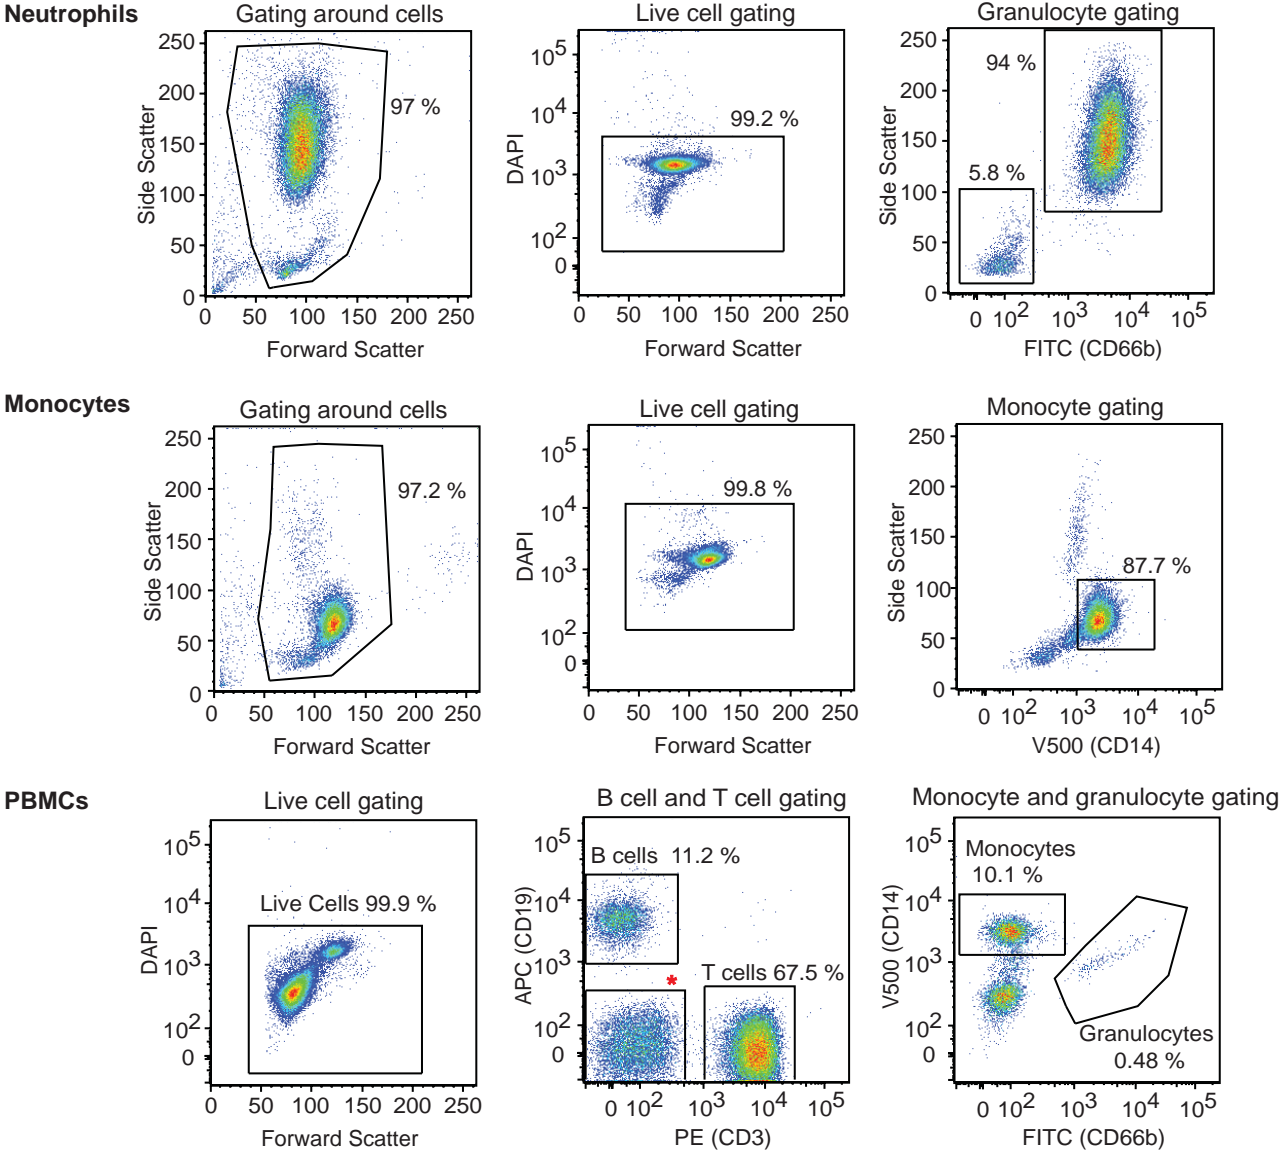

**Supplementary Table S1: Demographic and clinical data for subjects analysed in Figures 4 and 6. Abbreviations iPD idiopathic Parkinson's disease; N/A not applicable; Age at Onset of Parkinson's disease AAO**

| Donor number | Group          | Gender | Age | AAO |
|--------------|----------------|--------|-----|-----|
| 1            | iPD            | m      | 57  | 50  |
| 2            | iPD            | f      | 66  | 52  |
| 3            | iPD            | m      | 71  | 69  |
| 5            | iPD            | f      | 53  | 50  |
| 6            | iPD            | m      | 75  | 68  |
| 7            | iPD            | m      | 82  | 72  |
| 8            | iPD            | m      | 58  | 55  |
| 9            | Control non-PD | f      | 42  | N/A |
| 12           | iPD            | m      | 80  | 75  |
| 13           | iPD            | m      | 65  | 60  |
| 14           | Control non-PD | f      | 27  | N/A |
| 15           | VPS35het D620N | f      | 64  | 51  |
| 16           | Control non-PD | m      | 65  | N/A |
| 17           | VPS35het D620N | f      | 75  | 47  |
| 18           | Control non-PD | m      | 58  | N/A |
| 19           | Control non-PD | m      | 44  | N/A |
| 22           | Control non-PD | m      | 52  | N/A |
| 24           | Control non-PD | m      | 60  | N/A |
| 25           | VPS35het D620N | f      | 54  | 47  |
| 26           | Control non-PD | f      | 56  | N/A |
| 27           | Control non-PD | f      | 70  | N/A |
